# Supplementary material for: Inflammation-type dysbiosis of the oral microbiome associates with the duration of COVID-19 symptoms and long COVID
Source: PubMed Central journal article supplement (PMC8564890; doi:10.1172/jci.insight.152346), 2021-10-22
Supplement: jciinsight-6-152346-s090.pdf [file jciinsight-6-152346-s090.pdf]

**Supplemental Table 1: Sequencing reads from each sample**

| Sample ID | Total Reads | Total Contam | R1 Metag Paired | R1 Metag Unpaired | R2 Metag Paired | R2 Metag Unpaired | R1 Contam Paired | R1 Contam Unpaired | R2 Contam Paired | R2 Contam Unpaired |
|-----------|-------------|--------------|-----------------|-------------------|-----------------|-------------------|------------------|--------------------|------------------|--------------------|
| CHC10103  | 1,012,891   | 34,424,360   | 335,984         | 167,903           | 335,984         | 173,020           | 16,559,216       | 901,443            | 16,559,216       | 404,485            |
| CHC10104  | 20,236,681  | 14,525,368   | 9,764,560       | 484,302           | 9,764,560       | 223,259           | 6,962,721        | 376,218            | 6,962,721        | 223,708            |
| CHC10105  | 853,438     | 28,710,414   | 311,762         | 117,616           | 311,762         | 112,298           | 13,620,984       | 940,516            | 13,620,984       | 527,930            |
| CHC10106  | 3,362,861   | 63,280,232   | 1,394,025       | 310,029           | 1,394,025       | 264,782           | 28,798,434       | 3,459,553          | 28,798,434       | 2,223,811          |
| CHC10115  | 5,111,452   | 46,164,679   | 2,222,951       | 374,040           | 2,222,951       | 291,510           | 20,888,308       | 2,601,437          | 20,888,308       | 1,786,626          |
| SCVD030   | 1,336,383   | 17,076,965   | 544,760         | 145,449           | 544,760         | 101,414           | 7,701,798        | 1,092,277          | 7,701,798        | 581,092            |
| SCVD048   | 1,949,734   | 37,905,329   | 812,344         | 180,460           | 812,344         | 144,586           | 17,474,757       | 1,729,102          | 17,474,757       | 1,226,713          |
| SCVD079   | 1,032,373   | 43,237,734   | 367,341         | 164,791           | 367,341         | 132,900           | 19,988,829       | 1,932,160          | 19,988,829       | 1,327,916          |
| SCVD128   | 6,700,616   | 23,192,009   | 2,988,588       | 418,950           | 2,988,588       | 304,490           | 10,553,244       | 1,253,769          | 10,553,244       | 831,752            |
| SCVD129   | 4,156,351   | 36,833,053   | 1,900,706       | 198,364           | 1,900,706       | 156,575           | 17,771,266       | 890,742            | 17,771,266       | 399,779            |
| SCVD131   | 871,703     | 30,864,328   | 337,272         | 103,252           | 337,272         | 93,907            | 14,543,851       | 1,110,319          | 14,543,851       | 666,307            |
| SCVD132   | 3,095,655   | 18,663,276   | 1,367,498       | 207,700           | 1,367,498       | 152,959           | 8,562,504        | 934,888            | 8,562,504        | 603,380            |
| SCVD135   | 3,690,522   | 6,047,358    | 1,630,896       | 253,527           | 1,630,896       | 175,203           | 2,691,454        | 393,247            | 2,691,454        | 271,203            |
| SCVD138   | 7,158,271   | 30,493,962   | 3,352,217       | 271,875           | 3,352,217       | 181,962           | 14,608,038       | 858,958            | 14,608,038       | 418,928            |
| SCVD141   | 7,951,136   | 14,881,428   | 3,637,656       | 385,022           | 3,637,656       | 290,802           | 6,802,068        | 726,752            | 6,802,068        | 550,540            |
| SCVD145   | 2,618,272   | 14,660,326   | 1,165,040       | 170,484           | 1,165,040       | 117,708           | 6,646,978        | 827,718            | 6,646,978        | 538,652            |
| SCVD149   | 12,357,568  | 14,995,355   | 5,669,542       | 650,081           | 5,669,542       | 368,403           | 6,868,207        | 800,216            | 6,868,207        | 458,725            |
| SCVD151   | 21,701,748  | 18,385,572   | 10,179,762      | 826,585           | 10,179,762      | 515,639           | 8,639,698        | 696,134            | 8,639,698        | 410,042            |
| SCVD155   | 11,697,572  | 13,303,612   | 5,344,131       | 610,189           | 5,344,131       | 399,121           | 6,062,729        | 717,477            | 6,062,729        | 460,677            |
| SCVD158   | 5,013,754   | 28,788,410   | 2,351,166       | 179,579           | 2,351,166       | 131,843           | 13,909,974       | 648,000            | 13,909,974       | 320,462            |
| SCVD159   | 13,269,437  | 16,955,886   | 6,132,040       | 601,723           | 6,132,040       | 403,634           | 7,806,357        | 798,515            | 7,806,357        | 544,657            |
| SCVD160   | 12,140,620  | 8,721,154    | 5,593,143       | 587,854           | 5,593,143       | 366,480           | 3,983,447        | 460,771            | 3,983,447        | 293,489            |
| SCVD166   | 1,153,447   | 14,342,157   | 485,810         | 101,079           | 485,810         | 80,748            | 6,628,872        | 666,212            | 6,628,872        | 418,201            |
| SCVD171   | 11,612,068  | 26,757,868   | 5,508,717       | 381,855           | 5,508,717       | 212,779           | 12,826,998       | 755,875            | 12,826,998       | 347,997            |
| SCVD172   | 1,439,100   | 35,547,252   | 593,291         | 127,256           | 593,291         | 125,262           | 17,070,827       | 940,685            | 17,070,827       | 464,913            |
| SVD175    | 496,127     | 10,963,488   | 178,669         | 73,439            | 178,669         | 65,350            | 4,882,114        | 732,769            | 4,882,114        | 466,491            |

ID, identification; R1, first mates; R2, second mates; Metag, metagenomic; Contam, contaminants
